# Supplementary material for: Ocoxin Modulates Cancer Stem Cells and M2 Macrophage Polarization in Glioblastoma
Source: Hindawi journal article supplement (doi:10.1155/2019/9719730), 2019-08-05
Supplement: f1 [file 9719730.f1.pdf]

**Title: Ocoxin modulates cancer stem cells and M2-macrophage polarization in glioblastoma.**

**Authors:** Esther Hernández-SanMiguel<sup>1</sup>, Ricardo Gargini<sup>2</sup>, Teresa Cejalvo<sup>3</sup>, Berta Segura-Collar<sup>1</sup>, Paula Núñez-Hervada<sup>1</sup>, Rafael Hortigüela<sup>1</sup>, Juan M. Sepúlveda-Sánchez<sup>3</sup>, Aurelio Hernández-Lain<sup>3</sup>, Angel Pérez-Núñez<sup>3</sup>, Eduardo Sanz<sup>4</sup>, Pilar Sánchez-Gómez<sup>1</sup>

1 Neurooncology Unit, Instituto de Salud Carlos III-UFIEC, Madrid, Spain

2 Centro de Biología Molecular, CSIC, Madrid, Spain

3 Unidad Multidisciplinar de Neurooncología, Hospital Universitario 12 de Octubre, Madrid, Spain

4 Catalysis S.L., Madrid, Spain

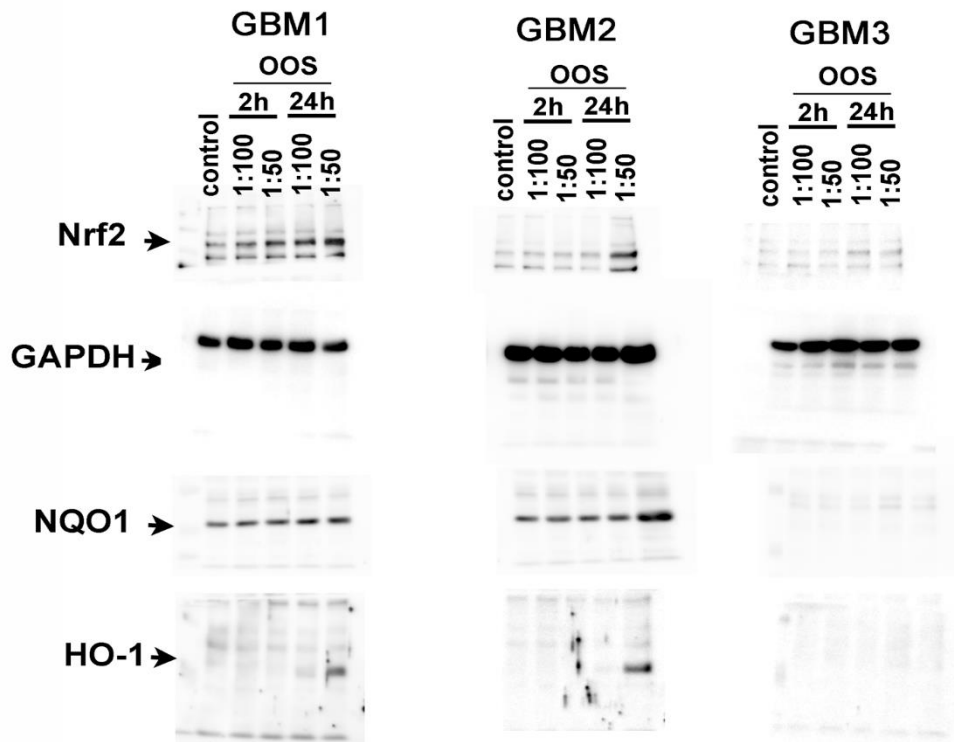

**Supplementary Figure S1. Full-length blots of Figure 1E.** GBM cells were treated with OOS (1:100 or 1:50) for 2 or 24h and expression of Nrf2, NQO1 and HO-1 was measured by WB. Non-treated spheres were used as a control and the expression of GAPDH as a loading control.

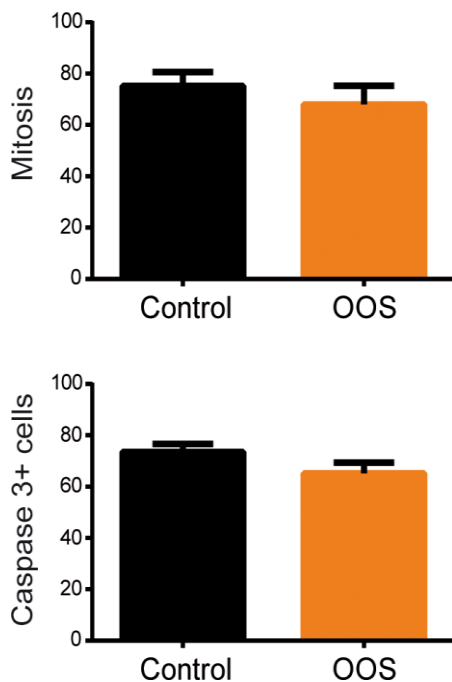

**Supplementary Figure S2. OOS does not induce overall changes in proliferation or cell death in GBM1 tumors.** Paraffin sections of GBM1 flank tumors were stained with hematoxylin-eosin to count the number of mitosis (upper panel) or were stained with Activated Caspase 3 antibody, to count apoptotic cells (lower panel). In both cases, the graphs represent the number of cells counted in 10 fields per tumor (n=10).

| <b>Primary antibody</b>    | <b>Host species</b> | <b>Use dilution</b> | <b>Provider</b> |
|----------------------------|---------------------|---------------------|-----------------|
| <b>Activated Caspase-3</b> | Rabbit              | 1:100 (IHC)         | Cell Signaling  |
| <b>CD44-FITC</b>           | Mouse               | 1:10 (FC)           | ImmunoTools     |
| <b>GAPDH</b>               | Mouse               | 1:1000 (WB)         | Santa Cruz      |
| <b>HO-1</b>                | Rabbit              | 1:1000 (WB)         | Millipore       |
| <b>NQO-1</b>               | Goat                | 1:2000 (WB)         | Abcam           |
| <b>Nrf2</b>                | Rabbit              | 1:1000 (WB)         | Diagenode       |

**Supplementary Table S1:** List of primary antibodies for immunohistochemical DAB staining (IHC), flow cytometry (FC) and western blot (WB).

| <b>Secondary antibody</b>         | <b>Host species</b> | <b>Use dilution</b> | <b>Provider</b> |
|-----------------------------------|---------------------|---------------------|-----------------|
| <b>Biotinylated anti rabbit</b>   | horse               | 1:200 (IHC)         | Vector          |
| <b>HRP-conjugated anti goat</b>   | rabbit              | 1:2000 (WB)         | Dako            |
| <b>HRP-conjugated anti mouse</b>  | sheep               | 1:5000 (WB)         | GE Healthcare   |
| <b>HRP-conjugated anti rabbit</b> | donkey              | 1:5000 (WB)         | GE Healthcare   |

**Supplementary Table S2:** List of secondary antibodies for immunohistochemical DAB staining (IHC) and western blot (WB).

| <b>Gene name</b> | <b>Forward primer 5'-3'</b> | <b>Reverse primer 5'-3'</b> |
|------------------|-----------------------------|-----------------------------|
| <i>hACSS1</i>    | GGTGGACTCCATGCCTCTT         | AGAGCGTTGCTTTGATCTGG        |
| <i>hCAT</i>      | TTAATCCATTGATCTCACC         | GGCGGTGAGTGTGAGGATAG        |
| <i>hGSR</i>      | TGGCACTTGCGTGAATGTTG        | CACATAGGCATCCCGCTTTTC       |
| <i>hLDHC1</i>    | CTTGACCTGCTGTGACAAT         | TTCAGCATGGCAGTCTTTTC        |
| <i>hNESTIN</i>   | GCGGCTGCGGGCTACTGAAA        | CCAGCTGCTGCCGACCTTCC        |
| <i>hCD133</i>    | GCCACCGCTCTAGATACTGC        | TGTTGTGATGGGCTTGTCAT        |
| <i>hCD44</i>     | AGAAGGTGTGGGCAGAAGAA        | AAATGCACCATTTCCTGAGA        |
| <i>hSOX2</i>     | GCGAACCATCTCTGTGGTC         | AATGGAAAGTTGGGATCGAA        |
| <i>hSOD2</i>     | GGCCTACGTGAACAACCTGAA       | CTGTAACATCTCCCTTGGCCA       |
| <i>hTUB</i>      | TGGAACCCACAGTCATTGATGA      | TGATCTCCTTGCCAATGGTGTA      |
| <i>bmActin</i>   | CCGGGACCTGACAGACTACCT       | GCCATCTCCTGCTCGAAGTCTA      |
| <i>mArg1</i>     | TGAGAGACCACGGGGACCTG        | GCACCACACTGACTCTTCCATTC     |
| <i>mCcl22</i>    | CATCATGGCTACCCTGCGTGTCCC    | CCTCCTCCCTAGGACAGTTTATGGA   |
| <i>mCHI3L3</i>   | TGGAATTGGTGCCCTACAA         | AACTTGCACTGTGTATATTG        |
| <i>mIL18</i>     | CATGTACAAAGACAGTGAAGTAAGAGG | TTTCAGGTGGATCCATTTC         |
| <i>mMR</i>       | GTAGTACCGGAGGGTGCAGA        | TTTGCATCAGTGAAGGTGGA        |
| <i>mNOS2</i>     | GAGCTGGGCTGTACAAACCTT       | CATTGGAAGTGAAGCGTTTCG       |
| <i>h-mRPII</i>   | GCACCACGTCCAATGACAT         | GTGCGGCTGCTTCATAA           |

**Supplementary Table S3:** List of primers used for RT-PCR.
